# Supplementary material
Source: publisher site journal article supplement (https://www.dovepress.com/article/578670)
Supplement: Supplementary file 1 [file 578670%20Revised%20Supplementary%20Materials.docx]

**Appendix 1：Search Strategy**

**Web of Science Core Collection Search Strategy**

**#1**

TS= ("Hepatocellular Carcinoma" OR "Liver Cancer*" OR HCC OR HCCs OR "Intrahepatic Cholangiocarcinoma" OR "Liver Neoplasm*" OR "Liver Tumor*" OR "Liver Tumour*" OR "Combined Hepatocellular-Cholangiocarcinoma" OR cHCC-CCA* OR "Primary Liver Cancer" OR "Hepatocellular Cancer" OR "Hepatoma" OR "Hepatocarcinoma" OR "Liver Carcinoma" OR "Primary Liver Carcinoma" OR "Liver Carcinomas" OR "Liver Cell Carcinoma" OR "Hepatic Cancer" OR "Primary Hepatic Cancer" OR "Cancer of the Liver" OR "Cancer of Liver" OR "Liver Malignancy" OR "Malignant Tumor of Liver" OR "Hepatoblastoma")

**#2**

TS= ("Artificial Intelligence" OR AI OR "Machine Learning" OR "Deep Learning" OR "Convolutional Neural Network*" OR CNN* OR "Neural Network*" OR "Transfer Learning" OR "Natural Language Processing" OR NLP OR "Computer Vision System*" OR "Support Vector Machine" OR SVM OR "Random Forest" OR "Large Language Model*" OR LLM* OR "Vision Transformer*" OR ViT OR "Transformer*" OR "Generative Adversarial Network*" OR GAN OR "Explainable AI" OR XAI OR "U-net" OR Unet OR "Multimodal Learning" OR "Multimodal Fusion" OR "Multimodal Integration" OR "Federated Learning" OR "Self-supervised Learning" OR "Weakly-supervised Learning" OR "Graph Neural Network*" OR "Recurrent Neural Network*" OR LSTM OR "Attention Mechanism" OR "Diffusion Model*" OR "Foundation Model*" OR ResNet OR XGBoost OR "Bayes* Network" OR "Naive Bayes" OR "Computational Intelligence" OR "Machine Intelligence" OR "Hierarchical Learning" OR ANN OR "Deep Network*" OR "Algorithmic Neural Network" OR "Computational Neural Network*" OR "Computer Neural Network*" OR "Connectionist Model*" OR Perceptron* OR "Learning Machine*" OR "Semantic Segmentation" OR "Feature* Learning" OR "Feature* Selection" OR "Feature* Mining" OR "Knowledge Graph" OR "Expert* System*" OR "Computer-aided Diagnosis" OR CAD OR "Big Data" OR "Robotic*" OR "Automatic Segmentation" OR "Image* Segmentation" OR "Feature* Extraction" OR "Image Analys*" OR "Image Process*" OR "Image Reconstruction*" OR "Clinical AI" OR "Outcome Prediction" OR "Anomaly Detection" OR "Uncertainty Quantification" OR "Multi-task Learning" OR "Contrastive Learning" OR "Few-shot Learning")

**#3**

TS= ("Magnetic Resonance Imag*" OR MRI OR "Computed Tomography*" OR CT OR "Ultrasound" OR "Ultrasonography" OR "Positron Emission Tomography*" OR PET OR "Multiparametric MRI" OR "mpMRI" OR "Contrast-enhanced Ultrasound" OR CEUS OR "Hepatobiliary Phase" OR "Arterial Phase" OR "Portal Venous Phase" OR "Apparent Diffusion Coefficient" OR ADC OR "Intravoxel Incoherent Motion" OR IVIM OR "Elastography" OR "Liver Imaging Reporting and Data System" OR "LI-RADS" OR "Dual-Energy CT" OR "DECT" OR "Spectral CT" OR "Perfusion Imaging" OR "Multimodal Imaging" OR "Multiparametric Imaging" OR "Chemical Shift Imag*" OR "Magnetization Transfer Imaging" OR "Magnetization Transfer Contrast Imaging" OR "Gadoxetic Acid" OR "Gd-EOB-DTPA" OR "Diagnostic Imaging" OR "Medical Imaging" OR "Medical Imag*" OR Radiology OR Radiologic* OR "Tomography*" OR "Functional MRI*" OR fMRI OR "Functional Magnetic Resonance Imaging" OR Scan* OR "MR Imaging" OR "MRI Scan*" OR "CT Scan*" OR "PET Scan*" OR "Ultrasonographic" OR "Ultrasonic" OR "Sonography" OR "Echotomography" OR "US" OR "Ultrasomics" OR "Imaging Phenotype*" OR "PET/CT" OR "PET-CT*" OR "PET Imaging*" OR "X-Ray Computed Tomography" OR "Computerized Tomography*" OR "Computed X-Ray Tomography" OR "Transmission Computed Tomography" OR "Cine CT" OR "Cine-CT" OR "Electron Beam Computed Tomography" OR "Electron Beam Tomography" OR "Positron-Emission Tomography*" OR "Computer Assisted Positron Emission Tomography" OR "Magnetic Resonance Tomography" OR "MR Tomography" OR "NMR Imaging" OR "NMR Tomography" OR "Proton Spin Tomography" OR "Diagnostic X-Ray*" OR "X-Ray Computer Assisted Tomography" OR "X-Ray Computerized Tomography" OR "X-Ray CT Scan*" OR "CAT Scan*" OR "X-Ray CAT Scan*" OR Roentgenologic* OR Roentgenography)

**#4**

TS= ("Radiomic*" OR "Imaging Biomarkers" OR "Quantitative Imaging" OR "Radiogenomic*" OR "Image Feature*" OR "Textur*" OR "Imageomics")

**#5**  #2 AND #3

**#6** #4 OR #5

**#7**  #1 AND #6

**#8** #7 AND PY= (2008-2025) AND DT= (Article OR Review) AND LA=English

**Scopus database Search Strategy**

( TITLE-ABS-KEY ( "Hepatocellular Carcinoma" OR "Liver Cancer*" OR HCC OR HCCs OR "Intrahepatic Cholangiocarcinoma" OR "Liver Neoplasm*" OR "Liver Tumor*" OR "Liver Tumour*" OR "Combined Hepatocellular-Cholangiocarcinoma" OR cHCC-CCA* OR "Primary Liver Cancer" OR "Hepatocellular Cancer" OR "Hepatoma" OR "Hepatocarcinoma" OR "Liver Carcinoma" OR "Primary Liver Carcinoma" OR "Liver Carcinomas" OR "Liver Cell Carcinoma" OR "Hepatic Cancer" OR "Primary Hepatic Cancer" OR "Cancer of the Liver" OR "Cancer of Liver" OR "Liver Malignancy" OR "Malignant Tumor of Liver" OR "Hepatoblastoma") ) AND ( TITLE-ABS-KEY ( "Radiomic*" OR "Imaging Biomarkers" OR "Quantitative Imaging" OR "Radiogenomic*" OR "Image Feature*" OR "Textur*" OR "Imageomics") OR ( TITLE-ABS-KEY ("Artificial Intelligence" OR AI OR "Machine Learning" OR "Deep Learning" OR "Convolutional Neural Network*" OR CNN* OR "Neural Network*" OR "Transfer Learning" OR "Natural Language Processing" OR NLP OR "Computer Vision System*" OR "Support Vector Machine" OR SVM OR "Random Forest" OR "Large Language Model*" OR LLM* OR "Vision Transformer*" OR ViT OR "Transformer*" OR "Generative Adversarial Network*" OR GAN OR "Explainable AI" OR XAI OR "U-net" OR Unet OR "Multimodal Learning" OR "Multimodal Fusion" OR "Multimodal Integration" OR "Federated Learning" OR "Self-supervised Learning" OR "Weakly-supervised Learning" OR "Graph Neural Network*" OR "Recurrent Neural Network*" OR LSTM OR "Attention Mechanism" OR "Diffusion Model*" OR "Foundation Model*" OR ResNet OR XGBoost OR "Bayes* Network" OR "Naive Bayes" OR "Computational Intelligence" OR "Machine Intelligence" OR "Hierarchical Learning" OR ANN OR "Deep Network*" OR "Algorithmic Neural Network" OR "Computational Neural Network*" OR "Computer Neural Network*" OR "Connectionist Model*" OR Perceptron* OR "Learning Machine*" OR "Semantic Segmentation" OR "Feature* Learning" OR "Feature* Selection" OR "Feature* Mining" OR "Knowledge Graph" OR "Expert* System*" OR "Computer-aided Diagnosis" OR CAD OR "Big Data" OR "Robotic*" OR "Automatic Segmentation" OR "Image* Segmentation" OR "Feature* Extraction" OR "Image Analys*" OR "Image Process*" OR "Image Reconstruction*" OR "Clinical AI" OR "Outcome Prediction" OR "Anomaly Detection" OR "Uncertainty Quantification" OR "Multi-task Learning" OR "Contrastive Learning" OR "Few-shot Learning") AND TITLE-ABS-KEY ( "Magnetic Resonance Imag*" OR MRI OR "Computed Tomography*" OR CT OR "Ultrasound" OR "Ultrasonography" OR "Positron Emission Tomography*" OR PET OR "Multiparametric MRI" OR "mpMRI" OR "Contrast-enhanced Ultrasound" OR CEUS OR "Hepatobiliary Phase" OR "Arterial Phase" OR "Portal Venous Phase" OR "Apparent Diffusion Coefficient" OR ADC OR "Intravoxel Incoherent Motion" OR IVIM OR "Elastography" OR "Liver Imaging Reporting and Data System" OR "LI-RADS" OR "Dual-Energy CT" OR "DECT" OR "Spectral CT" OR "Perfusion Imaging" OR "Multimodal Imaging" OR "Multiparametric Imaging" OR "Chemical Shift Imag*" OR "Magnetization Transfer Imaging" OR "Magnetization Transfer Contrast Imaging" OR "Gadoxetic Acid" OR "Gd-EOB-DTPA" OR "Diagnostic Imaging" OR "Medical Imaging" OR "Medical Imag*" OR Radiology OR Radiologic* OR "Tomography*" OR "Functional MRI*" OR fMRI OR "Functional Magnetic Resonance Imaging" OR Scan* OR "MR Imaging" OR "MRI Scan*" OR "CT Scan*" OR "PET Scan*" OR "Ultrasonographic" OR "Ultrasonic" OR "Sonography" OR "Echotomography" OR "US" OR "Ultrasomics" OR "Imaging Phenotype*" OR "PET/CT" OR "PET-CT*" OR "PET Imaging*" OR "X-Ray Computed Tomography" OR "Computerized Tomography*" OR "Computed X-Ray Tomography" OR "Transmission Computed Tomography" OR "Cine CT" OR "Cine-CT" OR "Electron Beam Computed Tomography" OR "Electron Beam Tomography" OR "Positron-Emission Tomography*" OR "Computer Assisted Positron Emission Tomography" OR "Magnetic Resonance Tomography" OR "MR Tomography" OR "NMR Imaging" OR "NMR Tomography" OR "Proton Spin Tomography" OR "Diagnostic X-Ray*" OR "X-Ray Computer Assisted Tomography" OR "X-Ray Computerized Tomography" OR "X-Ray CT Scan*" OR "CAT Scan*" OR "X-Ray CAT Scan*" OR Roentgenologic* OR Roentgenography) ) ) AND PUBYEAR > 2007 AND PUBYEAR < 2026 AND ( LIMIT-TO ( DOCTYPE , "ar" ) OR LIMIT-TO ( DOCTYPE , "re" ) ) AND ( LIMIT-TO ( LANGUAGE , "English" ) )

**Supplement Tables**

**Table S1 Top 20 Most Productive Institutions Regarding AI and radiomics in PLC.**

| **Rank** | **Institution** | **Publications** | **Percentage (% of 2,890)** | **TC** | **AC** |
| --- | --- | --- | --- | --- | --- |
| 1 | Sun Yat-Sen University | 186 | 6.44% | 3,726 | 20.03 |
| 2 | Fudan University | 128 | 4.43% | 2,670 | 20.86 |
| 3 | Zhejiang University | 116 | 4.01% | 2,808 | 24.21 |
| 4 | Chinese Academy of Sciences | 96 | 3.32% | 3,930 | 40.94 |
| 5 | Southern Medical University | 82 | 2.84% | 1,876 | 22.88 |
| 6 | Sichuan University | 78 | 2.70% | 1,501 | 19.24 |
| 7 | GE Healthcare | 73 | 2.53% | 2,087 | 28.59 |
| 8 | Capital Medical University | 52 | 1.80% | 681 | 13.10 |
| 9 | Wenzhou Medical University | 52 | 1.80% | 560 | 10.77 |
| 10 | Shanghai Jiao Tong University | 51 | 1.76% | 815 | 15.98 |
| 11 | Chinese Academy of Medical Sciences | 47 | 1.63% | 871 | 18.53 |
| 12 | Stanford University | 46 | 1.59% | 2,098 | 45.61 |
| 13 | Fujian Medical University | 46 | 1.59% | 500 | 10.87 |
| 14 | Huazhong University of Science &Technology | 44 | 1.52% | 830 | 18.86 |
| 15 | Guangxi Medical University | 43 | 1.49% | 457 | 10.63 |
| 16 | Zhengzhou University | 42 | 1.45% | 854 | 20.33 |
| 17 | Harvard University | 41 | 1.42% | 1,558 | 38.00 |
| 18 | Nanjing Medical University | 41 | 1.42% | 1,519 | 37.05 |
| 19 | Seoul National University | 41 | 1.42% | 1,161 | 28.32 |
| 20 | Central South University | 40 | 1.38% | 1,102 | 27.55 |

**Abbreviations:** TC, Total Citations; AC, Average Citations

**Table S2 Information on the Top 30 Prominent Journals.**

| **Rank** | **Journal Name** | **Publications** | **Citations** | **IF**  **(2024)** | **JCR** | 1. **-index** |
| --- | --- | --- | --- | --- | --- | --- |
| 1 | *Frontiers in Oncology* | 148 | 2,369 | 3.3 | Q2 | 28 |
| 2 | *Abdominal Radiology* | 92 | 1,692 | 2.2 | Q2 | 22 |
| 3 | *European Radiology* | 88 | 4,307 | 4.7 | Q1 | 36 |
| 4 | *Medical Physics* | 75 | 1,229 | 3.2 | Q1 | 21 |
| 5 | *Journal of Hepatocellular Carcinoma* | 65 | 266 | 3.4 | Q2 | 9 |
| 6 | *Academic Radiology* | 62 | 829 | 3.9 | Q1 | 18 |
| 7 | *Scientific Reports* | 60 | 1,193 | 3.9 | Q1 | 19 |
| 8 | *Diagnostics* | 55 | 566 | 3.3 | Q1 | 14 |
| 9 | *Computers in Biology and Medicine* | 52 | 1,436 | 6.3 | Q1 | 22 |
| 10 | *Cancers* | 46 | 996 | 4.4 | Q2 | 17 |
| 11 | *European Journal of Radiology* | 44 | 772 | 3.3 | Q1 | 17 |
| 12 | *Journal of Magnetic Resonance Imaging* | 43 | 1,307 | 3.5 | Q1 | 20 |
| 13 | *International Journal of Computer Assisted Radiology and Surgery* | 43 | 856 | 2.3 | Q2 | 19 |
| 14 | *World Journal of Gastroenterology* | 43 | 757 | 5.4 | Q1 | 18 |
| 15 | *BMC Cancer* | 38 | 708 | 3.4 | Q2 | 14 |
| 16 | *Biomedical Signal Processing and Control* | 38 | 325 | 4.9 | Q2 | 11 |
| 17 | *BMC Medical Imaging* | 35 | 480 | 3.2 | Q1 | 10 |
| 18 | *Physics in Medicine and Biology* | 34 | 873 | 3.4 | Q1 | 14 |
| 19 | *IEEE Journal of Biomedical and Health Informatics* | 33 | 727 | 6.8 | Q1 | 17 |
| 20 | *IEEE Transactions on Medical Imaging* | 32 | 3,541 | 9.8 | Q1 | 22 |
| 21 | *Radiology* | 28 | 2,656 | 15.2 | Q1 | 22 |
| 22 | *Insights into Imaging* | 28 | 381 | 4.5 | Q1 | 11 |
| 23 | *Medical Image Analysis* | 27 | 1,667 | 11.8 | Q1 | 19 |
| 24 | *PLoS One* | 25 | 355 | 2.6 | Q2 | 10 |
| 25 | *IEEE Access* | 24 | 713 | 3.6 | Q2 | 11 |
| 26 | *Quantitative Imaging in Medicine and Surgery* | 24 | 363 | 2.3 | Q2 | 9 |
| 27 | *Cancer Imaging* | 21 | 785 | 3.5 | Q1 | 13 |
| 28 | *Computerized Medical Imaging and Graphics* | 21 | 435 | 4.9 | Q1 | 9 |
| 29 | *Clinical Radiology* | 21 | 249 | 1.9 | Q3 | 9 |
| 30 | *Computer Methods and Programs in Biomedicine* | 19 | 415 | 4.8 | Q1 | 10 |

**Abbreviations:** IF, Impact Factor; JCR, Journal Citation Reports

**Note:** IF data were obtained from the 2025 release of JCR (Clarivate Analytics; reporting 2024 Journal Impact Factors).

**Table S3 Information on the Top 10 Most Productive Authors.**

| **Rank** | **Author** | **Country** | **Publications** | **TC** | **AC** |
| --- | --- | --- | --- | --- | --- |
| 1 | Song, Bin | China | 42 | 898 | 21.38 |
| 2 | Wang, Wei | China | 32 | 998 | 31.19 |
| 3 | Zeng, Mengsu | China | 32 | 813 | 25.41 |
| 4 | Kuang, Ming | China | 27 | 1,191 | 44.11 |
| 5 | Chapiro, Julius | USA | 26 | 1,254 | 48.23 |
| 6 | Yang, Chun | China | 26 | 716 | 27.54 |
| 7 | Wang, Fang | China | 26 | 251 | 9.65 |
| 8 | Tian, Jie | China | 25 | 1,729 | 69.16 |
| 9 | Jiang, Hanyu | China | 25 | 596 | 23.84 |
| 10 | Zhang, Tao | China | 21 | 370 | 17.62 |

**Abbreviations:** TC, Total Citations; AC, Average Citations

**Table S4 Information on the Top 10 Most Cited Authors.**

| **Rank** | **Author** | **Country** | **TC** | **Publications** | **AC** |
| --- | --- | --- | --- | --- | --- |
| 1 | Li, Xiaomeng | China | 2,835 | 5 | 567.00 |
| 2 | Chen, Hao | China | 2,821 | 5 | 564.20 |
| 3 | Fu, Chi-Wing | China | 2,810 | 3 | 936.67 |
| 4 | Heng, Pheng-Ann | China | 2,810 | 3 | 936.67 |
| 5 | Dou, Qi | China | 2,390 | 2 | 1195.00 |
| 6 | Qi, Xiaojuan | China | 2,390 | 2 | 1195.00 |
| 7 | Tian, Jie | China | 1,729 | 25 | 69.16 |
| 8 | Xing, Lei | USA | 1,321 | 15 | 88.07 |
| 9 | Chapiro, Julius | USA | 1,254 | 26 | 48.23 |
| 10 | Kuang, Ming | China | 1,191 | 27 | 44.11 |

**Abbreviations:** TC, Total Citations; AC, Average Citations

**Table S5 The Top 25 Most Frequent and Centralized Keywords Regarding AI and Radiomics in PLC.**

| **Rank** | **Keyword** | **Counts** | **Centrality** |
| --- | --- | --- | --- |
| 1 | hepatocellular carcinoma | 1,057 | 0.36 |
| 2 | deep learning | 572 | 0.10 |
| 3 | magnetic resonance imaging | 299 | 0.06 |
| 4 | machine learning | 286 | 0.06 |
| 5 | computed tomography | 275 | 0.15 |
| 6 | artificial intelligence | 234 | 0.09 |
| 7 | microvascular invasion | 167 | 0.07 |
| 8 | liver cancer | 143 | 0.09 |
| 9 | liver tumor | 136 | 0.19 |
| 10 | convolutional neural networks | 114 | 0.13 |
| 11 | liver tumor segmentation | 99 | 0.13 |
| 12 | liver segmentation | 83 | 0.13 |
| 13 | intrahepatic cholangiocarcinoma | 76 | 0.05 |
| 14 | transarterial chemoembolization | 76 | 0.05 |
| 15 | image segmentation | 74 | 0.07 |
| 16 | ceus | 65 | 0.04 |
| 17 | computer-aided diagnosis | 59 | 0.11 |
| 18 | texture analysis | 55 | 0.09 |
| 19 | ct images | 53 | 0.06 |
| 20 | early recurrence | 50 | 0.05 |
| 21 | feature extraction | 49 | 0.05 |
| 22 | focal liver lesions | 48 | 0.08 |
| 23 | medical image segmentation | 43 | 0.04 |
| 24 | attention mechanism | 37 | 0.02 |
| 25 | medical imaging | 35 | 0.02 |
